# Supplementary material for: Physio- und sporttherapeutische Interventionen zur Behandlung eines Karpaltunnelsyndroms
Source: Springer Nature journal article supplement (doi:10.1007/s00482-022-00637-x), 2022-03-14
Supplement: MOESM1 [file 20217010]

| Autor                 | Jahr | Journal                         | Intervention (IG)                                                                  | Kontrolle (KG)              | Diagnose                                        | Patient:innen (IG)           | Patient:innen (KG) | Alter (IG) (MW ± SD)                   | Alter (KG) (MW ± SD) | Dauer (IG)         | follow-up | Mess-instrumente                                             | Ergebnisse (IG) Score                                                                                                                                                                                  | Ergebnisse (KG) Score                                                          | P-Wert                                                                               |
|-----------------------|------|---------------------------------|------------------------------------------------------------------------------------|-----------------------------|-------------------------------------------------|------------------------------|--------------------|----------------------------------------|----------------------|--------------------|-----------|--------------------------------------------------------------|--------------------------------------------------------------------------------------------------------------------------------------------------------------------------------------------------------|--------------------------------------------------------------------------------|--------------------------------------------------------------------------------------|
| Sakr al. [43]         | 2019 | Bioscience Research             | Neuro-dynamische Mobilisation                                                      | Karpal-knochen-mobilisation | Klinische & elektro-physiologische Untersuchung | 15 (w)                       | 15 (w)             | 36,47 ± 6,58                           | 36,40 ± 7,02         | 4 Wochen           | Prä-Post  | VAS                                                          | Prä: 7,80 ± 1,15<br>Post: 1,20 ± ,94                                                                                                                                                                   | Prä: 7,93 ± ,88<br>Post: 1,07 ± ,96                                            | Prä-Post IG: < 0,001<br>KG: < 0,001<br>Zwischen Gruppen Post: n.s.                   |
| Schmid et al. [44]    | 2012 | Journal of orthopaedic research | Heim-übungen: Sehnen- und Nerven-gleitübungen                                      | Nächtliche Schienung        | Klinische & elektro-physiologische Untersuchung | 10                           | 10                 | 49,9 ± 12,5                            | 57,9 ± 16,3          | 1 Woche            | 1 Woche   | VAS<br>BCTQ (SSS)                                            | Prä: 0,7 ± 1,3<br>Post: 0,8 ± 1,4<br>Prä: 1,8 ± 0,5<br>Post: 1,5 ± 0,6                                                                                                                                 | Prä: 1,2 ± 2,1<br>Post: 1,1 ± 1,1<br>Prä: 2,0 ± 0,4<br>Post: 1,7 ± 0,4         | n.s.<br>Prä-Post: IG: < 0,004<br>KG: <0,004)                                         |
| Shem et al. [46]      | 2020 | Journal of Hand Therapy         | Stretching                                                                         | Schein-therapie             | Klinische & elektro-physiologische Untersuchung | 19 (32 Hände)                | 17 (32 Hände)      | 50,05 ± 9,71                           | 48,18 ± 7,18         | 4x/Tag<br>6 Wochen | Prä-Post  | BCTQ (SSS)<br>BCTQ (FSS)                                     | Prä: 30,8 ± 8,76<br>Post: 27,0 ± 10,0<br>Prä: 29,3 ± 9,08<br>Post: 26,9 ± 11,3                                                                                                                         | Prä: 32,3 ± 7,68<br>Post: 29,3 ± 7,19<br>Prä: 23,3 ± 10,3<br>Post: 23,1 ± 9,57 | IG: 0,007<br>KG: n.s.<br>IG: n.s.<br>KG: n.s.                                        |
| Tal-Akabi et al. [48] | 2000 | Manual therapy                  | Neuro-dynamische mobilisation (Gruppe 1)<br>Karpal-knochen-mobilisation (Gruppe 2) | Keine Behandlung            | Klinische & elektro-physiologische Untersuchung | 7 (Gruppe 1)<br>7 (Gruppe 2) | 7                  | 47,1 ± 14,8 (range 29-85)<br>m:w = 1:2 | 3 Wochen             | 3 Wochen           | Prä-Post  | VAS<br>Pain relief scale (PRS)<br>Functional box scale (FBS) | Gruppe 1<br>Prä: 2,42<br>Post: 1,57<br>Gruppe 2<br>Prä: 2,29<br>Post: 0,71<br>Gruppe 1<br>Post: 3,14<br>Gruppe 2<br>Post: 3,71<br>Gruppe 1<br>Prä: 2<br>Post: 1,14<br>Gruppe 2<br>Prä: 2<br>Post: 0,71 | Prä: 2<br>Post: 2,14<br>Post: 0<br>Prä: 2,42<br>Post: 2,42                     | Prä-post: IG 1: < 0,02<br>IG 2: < 0,001<br>KG: n.s.<br>1 vs. 2 vs. 3: < 0,05<br>n.s. |

| Autor                | Jahr | Journal                                | Intervention (IG)          | Kontrolle (KG)               | Diagnose                                                               | Patient:innen (IG) | Patient:innen (KG) | Alter (IG) (MW ± SD) | Alter (KG) (MW ± SD) | Dauer (IG)  | follow-up | Mess-instrumente | Ergebnisse (IG) Score                   | Ergebnisse (KG) Score                   | P-Wert                                                              |
|----------------------|------|----------------------------------------|----------------------------|------------------------------|------------------------------------------------------------------------|--------------------|--------------------|----------------------|----------------------|-------------|-----------|------------------|-----------------------------------------|-----------------------------------------|---------------------------------------------------------------------|
| Talebi et al., [49]  | 2020 | Caspian Journal of Internal Medicine   | Weichteilmobilisation      | Neurodynamische Mobilisation | Klinische & elektro-physiologische Untersuchung                        | 15                 | 15                 | 48,86 ± 8,94         | 51,46 ± 9,62         | 3x/4 Wochen | Prä-post  | VAS              | Prä: 6,80 ± 1,65<br>Post: 3,93 ± 1,90   | Prä: 6,40 ± 1,45<br>Post: 3,53 ± 2,23   | Prä-post IG: < 0,001<br>KG: < 0,001<br>Zwischen Gruppen n.s.        |
|                      |      |                                        |                            |                              |                                                                        |                    |                    |                      |                      |             |           | BCTQ (SSS)       | Prä: 30,13 ± 8,95<br>Post: 21,73 ± 8,22 | Prä: 30,66 ± 7,82<br>Post: 19,26 ± 5,48 | Prä-post IG: < 0,001<br>KG: < 0,001<br>Zwischen Gruppen n.s.        |
|                      |      |                                        |                            |                              |                                                                        |                    |                    |                      |                      |             |           | BCTQ (FSS)       | Prä: 19,33 ± 8,05<br>Post: 14,53 ± 5,13 | Prä: 17,20 ± 6,77<br>Post: 12,33 ± 5,48 | Prä-post IG: = 0,001<br>KG: = 0,001<br>Zwischen Gruppen n.s.        |
| Vikranth et al. [50] | 2015 | International Journal of Physiotherapy | Karpalknochen Mobilisation | Neurodynamische Mobilisation | positiver Phalen Test, positiver Tinels Test, positiver ULTT2, VAS ≥ 4 | 15 (5 m)           | 15 (8 m)           | 40,73 ± 9,86         | 40,33 ± 9,41         | 2 Wochen    | Prä-Post  | VAS              | Prä: 5,53 ± 1,25<br>Post: 4,07 ± 1,39   | Prä: 5,60 ± 1,40<br>Post: 3,67 ± 1,23   | Prä-Post: IG: < 0,001<br>KG: < 0,001<br>Zwischen Gruppen Post: n.s. |
|                      |      |                                        |                            |                              |                                                                        |                    |                    |                      |                      |             |           | BCTQ (SSS)       | Prä: 2,48 ± 0,56<br>Post: 2,07 ± 0,56   | Prä: 2,56 ± 0,62<br>Post: 2,03 ± 0,46   | Prä-Post: IG: < 0,001<br>KG: < 0,001<br>Zwischen Gruppen Post: n.s. |
|                      |      |                                        |                            |                              |                                                                        |                    |                    |                      |                      |             |           | BCTQ (FSS)       | Prä: 2,32 ± 0,79<br>Post: 1,96 ± 0,70   | Prä: 2,56 ± 0,78<br>Post: 2,05 ± 0,69   | Prä-Post: IG: < 0,001<br>KG: < 0,001<br>Zwischen Gruppen Post: n.s. |

| Autor                                              | Jahr  | Journal                                                | Intervention (IG)                       | Kontrolle (KG)                        | Diagnose                                        | Patient:innen (IG) | Patient:innen (KG) | Alter (IG) (MW ± SD) | Alter (KG) (MW ± SD) | Dauer (IG)              | follow-up | Mess-instrumente                         | Ergebnisse (IG) Score                                                                                                           | Ergebnisse (KG) Score                                                                                                           | P-Wert                                                                                                                                                                                            |
|----------------------------------------------------|-------|--------------------------------------------------------|-----------------------------------------|---------------------------------------|-------------------------------------------------|--------------------|--------------------|----------------------|----------------------|-------------------------|-----------|------------------------------------------|---------------------------------------------------------------------------------------------------------------------------------|---------------------------------------------------------------------------------------------------------------------------------|---------------------------------------------------------------------------------------------------------------------------------------------------------------------------------------------------|
| Wolny et al. [51]                                  | 2018a | Journal of Manipulative and Physiological Therapeutics | Neuro-dynamische Techniken              | Keine Behandlung                      | Klinische Untersuchung                          | 102 (12 m)         | 87 (8 m)           | 52,6 ± 9,3           | 53,1 ± 8,9           | 10 Wochen               | Prä-Post  | BCTQ (SSS)<br><br>BCTQ (FSS)             | Prä: 5,5<br>Post: 3,03<br><br>Prä: -<br>Post: 2,88                                                                              | Prä: 5,6<br>Post: 3,04<br><br>Prä: -<br>Post: 2,91                                                                              | n.s.<br>n.s.<br>-<br>n.s.                                                                                                                                                                         |
| Wolny et al. [52]                                  | 2018b | Archives of physical medicine and rehabilitation       | Neuro-dynamische Techniken              | Scheinterapie                         | Klinische & elektro-physiologische Untersuchung | 78 (8 m)           | 72 (7 m)           | 54,2 ± 9,48          | 52,2 ± 10,4          | 10 Wochen               | Prä-Post  | NPRS<br><br>BCTQ (SSS)<br><br>BCTQ (FSS) | Prä: 5,95 ± 1,54<br>Post: 1,42 ± 1,02<br><br>Prä: 2,99 ± 0,67<br>Post: 1,77 ± 0,48<br><br>Prä: 2,84 ± 0,72<br>Post: 1,94 ± 0,61 | Prä: 5,58 ± 1,27<br>Post: 5,42 ± 0,99<br><br>Prä: 2,88 ± 0,72<br>Post: 2,86 ± 0,72<br><br>Prä: 3,04 ± 0,64<br>Post: 3,09 ± 0,68 | IG: p < 0,01<br>KG: n.s.<br>Zwischen Gruppen Post: p < 0,01<br><br>IG: p < 0,01<br>KG: n.s.<br>Zwischen Gruppen Post: p < 0,01<br><br>IG: p < 0,01<br>KG: n.s.<br>Zwischen Gruppen Post: p < 0,01 |
| Wolny et al. [53]                                  | 2019  | Clinical Rehabilitation                                | Neuro-dynamische Techniken              | Keine Behandlung                      | Elektro-physiologische Untersuchung             | 58 (6 m)           | 45 (5 m)           | 54,6 ± 9,7           | 53,1 ± 10,1          | 10 Wochen /2x Woche     | Prä-Post  | NPRS<br><br>BCTQ (SSS)<br><br>BCTQ (FSS) | Prä: 5,86 ± 1,46<br>Post: 1,38 ± 1,01<br><br>Prä: 3,03 ± 0,65<br>Post: 1,08 ± 0,68<br><br>Prä: 2,82 ± 0,71<br>Post: 1,96 ± 0,64 | Prä: 5,71 ± 1,34<br>Post: 5,46 ± 1,05<br><br>Prä: 2,92 ± 0,71<br>Post: 2,87 ± 0,68<br><br>Prä: 2,99 ± 0,67<br>Post: 2,87 ± 0,71 | n.s.<br><0,01<br>n.s.<br><0,01<br>n.s.<br><0,01                                                                                                                                                   |
| <b>Nerven-Sehnengleitübungen und Kinesiotaping</b> |       |                                                        |                                         |                                       |                                                 |                    |                    |                      |                      |                         |           |                                          |                                                                                                                                 |                                                                                                                                 |                                                                                                                                                                                                   |
| Aktürk et al. [2]                                  | 2018  | International League of Associations for Rheumatology  | Kinesiotape & Nerven-Sehnengleitübungen | Schienung & Nerven-Sehnengleitübungen | Elektromyographie                               | 28 Hände (22 w)    | 30 Hände (29 w)    | 49,2 ± 11,7          | 48,2 ± 9,2           | 10 Einheiten (5 Wochen) | Prä-Post  | BCTQ (SSS)<br><br>BCTQ (FSS)             | Prä: 33,1 ± 8,79<br>Post: 22,7 ± 8,01<br><br>Prä: 21,2 ± 9,17<br>Post: 12,14 ± 4,9                                              | Prä: 33,0 ± 4,23<br>Post: 32,7 ± 4,21<br><br>Prä: 19,4 ± 7,67<br>Post: 18,9 ± 7,46                                              | n.s.<br>0,001<br><br>n.s.<br>0,01                                                                                                                                                                 |

| Autor                                                                                                                                                                                                                   | Jahr | Journal                             | Intervention (IG)                                                                                  | Kontrolle (KG)                                            | Diagnose                                                            | Patient:innen (IG)     | Patient:innen (KG)                               | Alter (IG) (MW ± SD)                              | Alter (KG) (MW ± SD) | Dauer (IG) | follow-up                   | Mess-instrumente                                                                         | Ergebnisse (IG) Score                                                                                                                                                                                                        | Ergebnisse (KG) Score                                                                                                                                                                                                                                                                                                                                                 | P-Wert                                                                                                                                                                                                                                                                                                           |
|-------------------------------------------------------------------------------------------------------------------------------------------------------------------------------------------------------------------------|------|-------------------------------------|----------------------------------------------------------------------------------------------------|-----------------------------------------------------------|---------------------------------------------------------------------|------------------------|--------------------------------------------------|---------------------------------------------------|----------------------|------------|-----------------------------|------------------------------------------------------------------------------------------|------------------------------------------------------------------------------------------------------------------------------------------------------------------------------------------------------------------------------|-----------------------------------------------------------------------------------------------------------------------------------------------------------------------------------------------------------------------------------------------------------------------------------------------------------------------------------------------------------------------|------------------------------------------------------------------------------------------------------------------------------------------------------------------------------------------------------------------------------------------------------------------------------------------------------------------|
| Külcü et al. [28]                                                                                                                                                                                                       | 2016 | Turkish Journal of medical Sciences | 1: Kinesiotape & Heimübungen, Sehnen-gleitübungen<br>3: Orthese & Heimübungen, Sehnen-gleitübungen | 2: Plazebo Kinesiotape & Heimübungen, Sehnen-gleitübungen | Klinische Untersuchung, Symptome < 1 Jahr, sensorische Untersuchung | 1: 13 (20 Hände) (1 m) | 2: 13 (20 Hände) (0 m)<br>3: 14 (20 Hände) (1 m) | 1: 49,8 ± 11,5<br>2: 48,95 ± 6,0<br>3: 51,3 ± 8,3 |                      | 4 Wochen   | Prä-Post                    | VAS<br><br>pain characteristics and sensations (DN4)<br><br>BCTQ (SSS)<br><br>BCTQ (FSS) | Prä:<br>1: 6,6 ± 2,1<br><br>Post:<br>1: 4,1 ± 2,7<br><br>Prä:<br>1: 5,5 ± 2,3<br><br>Post:<br>1: 3,7 ± 2,3<br><br>Prä:<br>1: 32 ± 8,4<br><br>Post:<br>1: 20 ± 7,5<br><br>Prä:<br>1: 23,1 ± 6,0<br><br>Post:<br>1: 16,2 ± 5,4 | Prä:<br>2: 5,8 ± 3,2<br>3: 6,1 ± 2,9<br><br>Post:<br>2: 3,9 ± 2,8<br>3: 5,7 ± 3,1<br><br>Prä:<br>2: 4,6 ± 2,6<br>3: 4,5 ± 1,6<br><br>Post:<br>2: 3,0 ± 2,4<br>3: 3,7 ± 2,0<br><br>Prä:<br>2: 33 ± 10,7<br>3: 31,6 ± 8,4<br><br>Post:<br>2: 24,4 ± 8,0<br>3: 28,7 ± 11,8<br><br>Prä:<br>2: 19,7 ± 8,4<br>3: 21,7 ± 7,0<br><br>Post:<br>2: 16,3 ± 5,8<br>3: 19,7 ± 19,7 | 1: = 0,001<br>2: = 0,009<br>3: = 0,030<br><br>Zwischen Gruppen n.s.<br><br>1: = 0,005<br>2: = 0,003<br>3: = 0,024<br><br>Zwischen Gruppen n.s.<br><br>1: <0,0001<br>2: <0,0001<br>3: = 0,036<br><br>Zwischen Gruppen = 0,024 (1/3)<br><br>1: = 0,001<br>2: n.s.<br>3: n.s.<br><br>Zwischen Gruppen = 0,017 (1/3) |
| Yildirim et al. [56]                                                                                                                                                                                                    | 2018 | Turkish Journal of Medical Sciences | Kinesiotape & Nerven-Sehnen-gleitübungen                                                           | Nerven-Sehnen-gleitübungen                                | Klinische & elektro-physiologische Untersuchung                     | 11 (0 m)<br>19 Hände   | 10 (1 m)<br>19 Hände                             | 48,81 ± 6,40                                      | 48,70 ± 7,61         | 6 Wochen   | Prä<br>3 Wochen<br>6 Wochen | BCTQ (SSS)<br><br>BCTQ (FSS)                                                             | Prä:<br>33,26 ± 8,40<br><br>3 Wochen:<br>19,84 ± 4,65<br><br>6 Wochen:<br>22,15 ± 7,45<br><br>Prä:<br>20,57 ± 6,58<br><br>3 Wochen:<br>10,89 ± 4,40<br><br>6 Wochen:<br>13,26 ± 5,52                                         | Prä:<br>31,60 ± 9,48<br><br>3 Wochen:<br>25,66 ± 8,79<br><br>6 Wochen:<br>19,06 ± 7,18<br><br>Prä:<br>17,40 ± 5,55<br><br>3 Wochen:<br>13,73 ± 4,13<br><br>6 Wochen:<br>11,26 ± 4,63                                                                                                                                                                                  | Zwischen Gruppen:<br>= 0,02<br><br>n.s.<br><br>= 0,01<br><br>n.s.                                                                                                                                                                                                                                                |
| <b>Mobilisation (Weichteilmobilisation, Mobilisation assoziierter anatomischer Bereiche, Bindegewebsmobilisation, neurodynamische Mobilisation, Karpalknochenmobilisation, Faszienmobilisation, allgemeine Massage)</b> |      |                                     |                                                                                                    |                                                           |                                                                     |                        |                                                  |                                                   |                      |            |                             |                                                                                          |                                                                                                                                                                                                                              |                                                                                                                                                                                                                                                                                                                                                                       |                                                                                                                                                                                                                                                                                                                  |

| Autor                              | Jahr | Journal                                                | Intervention (IG)                                  | Kontrolle (KG)        | Diagnose                                        | Patient:innen (IG) | Patient:innen (KG) | Alter (IG) (MW ± SD) | Alter (KG) (MW ± SD) | Dauer (IG) | follow-up                                  | Mess-instrumente    | Ergebnisse (IG) Score                                                                                  | Ergebnisse (KG) Score                                                                                  | P-Wert                                                  |
|------------------------------------|------|--------------------------------------------------------|----------------------------------------------------|-----------------------|-------------------------------------------------|--------------------|--------------------|----------------------|----------------------|------------|--------------------------------------------|---------------------|--------------------------------------------------------------------------------------------------------|--------------------------------------------------------------------------------------------------------|---------------------------------------------------------|
| Burke et al. [15]                  | 2007 | Journal of manipulative and physiological therapeutics | Graston-Instrument gestützte Weichteilmobilisation | Weichteilmobilisation | Klinische & elektro-physiologische Untersuchung | 12 (2 m)           | 10 (1 m)           | 39,8 ± 8,8           | 43,4 ± 5,3           | 6 Wochen   | Direkt nach Intervention & 3 Monate danach | VAS                 | Prä: 6,15 ± 2,66<br>Immed: 0,98 ± 1,25<br>3 Monate 0,92 ± 1,10                                         | Prä: 6,05 ± 1,79<br>Immed: 1,54 ± 1,96<br>3 Monate 3,37 ± 2,88                                         | -<br><br>Zwischen Gruppen < 0,05                        |
|                                    |      |                                                        |                                                    |                       |                                                 |                    |                    |                      |                      |            |                                            | BCTQ (SSS)          | Prä: 3,0 ± 0,73<br>Immed: 1,8 ± 0,74<br>3 Monate 1,8 ± 0,61                                            | Prä: 2,7 ± 0,64<br>Immed: 1,9 ± 0,39<br>3 Monate 2,2 ± 0,59                                            | n.s.<br>n.s.                                            |
|                                    |      |                                                        |                                                    |                       |                                                 |                    |                    |                      |                      |            |                                            | BCTQ (FSS)          | Prä: 2,2 ± 0,88<br>Immed: 1,6 ± 0,65<br>3 Monate 1,6 ± 0,72                                            | Prä: 2,4 ± 0,85<br>Immed: 1,7 ± 0,70<br>3 Monate 1,7 ± 0,68                                            | n.s.<br>n.s.                                            |
| Fernández-de-Las Penas et al. [17] | 2015 | The Journal of pain                                    | Manuelle Therapie                                  | Operation             | Klinische & elektro-physiologische Untersuchung | 60 (0 m)           | 60 (0 m)           | 47 ± 10              | 46 ± 9               | 3 Wochen   | 1, 3, 6, 12 Monate                         | NPRS (Durchschnitt) | Prä: 4,8 ± 1,5<br>1 Monat 1,4 ± 1,9<br>3 Monate 1,1 ± 1,8<br>6 Monate 1,1 ± 1,6<br>12 Monate 1,2 ± 1,8 | Prä: 4,9 ± 2,2<br>1 Monat 3,4 ± 2,3<br>3 Monate 2,5 ± 2,1<br>6 Monate 1,8 ± 2,5<br>12 Monate 1,3 ± 1,9 | Zwischen Gruppen < 0,001<br><br>< 0,001<br>n.s.<br>n.s. |
|                                    |      |                                                        |                                                    |                       |                                                 |                    |                    |                      |                      |            |                                            | BCTQ (SSS)          | Prä: 2,5 ± 0,7<br>1 Monat 1,6 ± 0,5<br>3 Monate 1,6 ± 0,6<br>6 Monate 1,6 ± 0,6<br>12 Monate 1,5 ± 0,5 | Prä: 2,7 ± 0,6<br>1 Monat 1,7 ± 0,5<br>3 Monate 1,6 ± 0,4<br>6 Monate 1,5 ± 0,5<br>12 Monate 1,5 ± 0,5 | n.s.<br>n.s.<br>n.s.<br>n.s.                            |
|                                    |      |                                                        |                                                    |                       |                                                 |                    |                    |                      |                      |            |                                            | BCTQ (FSS)          | Prä: 2,3 ± 0,5<br>1 Monat 1,5 ± 0,4<br>3 Monate 1,5 ± 0,5                                              | Prä: 2,4 ± 0,6<br>1 Monat 2,3 ± 0,7<br>3 Monate 1,8 ± 0,7                                              | < 0,001<br>< 0,001                                      |

| Autor                              | Jahr  | Journal                                                | Intervention (IG)                                                      | Kontrolle (KG) | Diagnose                                        | Patient:innen (IG)  | Patient:innen (KG)  | Alter (IG) (MW ± SD) | Alter (KG) (MW ± SD) | Dauer (IG)                                      | follow-up                    | Mess-instrumente | Ergebnisse (IG) Score                                                                                              | Ergebnisse (KG) Score                                                                                              | P-Wert                                              |
|------------------------------------|-------|--------------------------------------------------------|------------------------------------------------------------------------|----------------|-------------------------------------------------|---------------------|---------------------|----------------------|----------------------|-------------------------------------------------|------------------------------|------------------|--------------------------------------------------------------------------------------------------------------------|--------------------------------------------------------------------------------------------------------------------|-----------------------------------------------------|
|                                    |       |                                                        |                                                                        |                |                                                 |                     |                     |                      |                      |                                                 |                              |                  | 6 Monate<br>1,5 ± 0,5                                                                                              | 6 Monate<br>1,6 ± 0,6                                                                                              | n.s.                                                |
|                                    |       |                                                        |                                                                        |                |                                                 |                     |                     |                      |                      |                                                 |                              |                  | 12 Monate<br>1,5 ± 0,5                                                                                             | 12 Monate<br>1,5 ± 0,6                                                                                             | n.s.                                                |
| Fernandez-de-Las-Peñas et al. [18] | 2017a | The Journal of orthopaedic and sports physical therapy | Manuelle Therapie                                                      | Operation      | Klinische & elektro-physiologische Untersuchung | 50 (0 m)            | 50 (0 m)            | 46 ± 9               | 47 ± 8               | 3 Wochen                                        | 1, 3, 6, 12 Monate           | BCTQ (SSS)       | Prä: 2,5 ± 0,7<br>1 Monat<br>1,7 ± 0,6<br>3 Monate<br>1,7 ± 0,7<br>6 Monate<br>1,6 ± 0,6<br>12 Monate<br>1,6 ± 0,6 | Prä: 2,6 ± 0,6<br>1 Monat<br>1,7 ± 0,5<br>3 Monate<br>1,5 ± 0,5<br>6 Monate<br>1,4 ± 0,5<br>12 Monate<br>1,4 ± 0,5 | n.s.<br>n.s.<br>n.s.<br>n.s.                        |
|                                    |       |                                                        |                                                                        |                |                                                 |                     |                     |                      |                      |                                                 |                              | BCTQ (FSS)       | Prä: 2,1 ± 0,5<br>1 Monat<br>1,6 ± 0,6<br>3 Monate<br>1,6 ± 0,7<br>6 Monate<br>1,6 ± 0,5<br>12 Monate<br>1,6 ± 0,6 | Prä: 2,2 ± 0,5<br>1 Monat<br>2,3 ± 0,7<br>3 Monate<br>1,7 ± 0,7<br>6 Monate<br>1,6 ± 0,6<br>12 Monate<br>1,5 ± 0,6 | <0,001<br>n.s.<br>n.s.<br>n.s.                      |
| Fernández-de-las-Peñas et al. [19] | 2017b | European Journal of Pain                               | Manuelle Therapie (Weichteilmobilisation & Sehnen-Nerven-gleitübungen) | Operation      | Klinische & elektro-physiologische Untersuchung | 50 (0 m)            | 50 (0 m)            | 47 ± 10              | 48 ± 9               | 3 Wochen & Heim-übungen 2x/Tag über einen Monat | 3, 6, 9, 12 Monate           | NPRS             | Grafik ca. Prä: 4,2<br>3 Monate<br>1,75<br>6 Monate<br>1,75<br>9 Monate<br>1,75<br>12 Monate<br>1,5                | Grafik ca. Prä: 4,4<br>3 Monate<br>3,2<br>6 Monate<br>2,3<br>9 Monate<br>2,0<br>12 Monate<br>1,5                   | <0,001<br>n.s.<br>n.s.<br>n.s.                      |
| Jiménez del Barrio et al. [26]     | 2018  | Clinical Rehabilitation                                | Manuelle Therapie (diakutane Fibrolyse)                                | Scheintherapie | Klinische Untersuchung                          | 25 (36 Hände) (6 m) | 27 (36 Hände) (5 m) | 44,97 ± 9,34         | 48,83 ± 7,98         | 5 x je 20 min (Ø 17,77 Tage)                    | Prä-Post & 1 Monat follow-up | VAS              | Prä: 3,32 ± 2,1<br>Post: 0,42 ± 0,82<br>1 Monat:<br>0,93 ± 1,78                                                    | Prä: 3,6 ± 2,29<br>Post: 3,48 ± 2,67<br>1 Monat:<br>3,99 ± 2,42                                                    | Zwischen Gruppen<br>Post < 0,01<br>follow-up < 0,01 |

| Autor                                                                | Jahr                      | Journal                                           | Intervention (IG)                        | Kontrolle (KG)                                 | Diagnose                                        | Patient:innen (IG) | Patient:innen (KG) | Alter (IG) (MW ± SD)              | Alter (KG) (MW ± SD)                | Dauer (IG)                      | follow-up                                          | Mess-instrumente | Ergebnisse (IG) Score                       | Ergebnisse (KG) Score                      | P-Wert                                                               |         |
|----------------------------------------------------------------------|---------------------------|---------------------------------------------------|------------------------------------------|------------------------------------------------|-------------------------------------------------|--------------------|--------------------|-----------------------------------|-------------------------------------|---------------------------------|----------------------------------------------------|------------------|---------------------------------------------|--------------------------------------------|----------------------------------------------------------------------|---------|
| Moraska et al. [34]                                                  | 2008                      | Journal of alternative and complementary medicine | Gezielte Massage (Arm-massage KTS) (TM)  | Generelle Massage (Nacken-Rücken-massage) (GM) | Klinische Untersuchung                          | 14                 | 13                 | 47,0 ± 8,80                       | 50,3 ± 15,1                         | 6 Wochen                        | Nach 11 Einheiten und 4 Wochen nach der Behandlung | BCTQ (SSS)       | (Grafik) Prä: 2,2<br>Post: 1,8 ± 0,2        | (Grafik) Prä: 2,3<br>Post: 1,9 ± 0,2       | n.s.                                                                 |         |
|                                                                      |                           |                                                   |                                          |                                                |                                                 |                    |                    |                                   |                                     |                                 |                                                    | BCTQ (FSS)       | (Grafik) Prä: 1,75<br>Post: 1,75            | (Grafik) Prä: 2,0<br>Post: 1,7             | n.s.                                                                 |         |
| <b>Physikalische Therapieformen (Laser- und Ultraschalltherapie)</b> |                           |                                                   |                                          |                                                |                                                 |                    |                    |                                   |                                     |                                 |                                                    |                  |                                             |                                            |                                                                      |         |
| Autor                                                                | Jahr                      | Journal                                           | Intervention (IG)                        | Kontrolle (KG)                                 | Diagnose                                        | Patient:innen (IG) | Patient:innen (KG) | Alter (IG) (MW ± SD)              | Alter (KG) (MW ± SD)                | Dauer (IG)                      | follow-up                                          | Mess-instrumente | Ergebnisse (IG)                             | Ergebnisse (KG)                            | P-Wert                                                               |         |
| Alam et al. [3]                                                      | 2018                      | Biomedical Research and Therapy                   | Neuro-dynamische Mobilisation            | Physikalische Therapie (Ultraschall)           | Elektro-diagnostische Tests, Phalen Test        | 24 (12m/12w)       | 24 (2m/22w)        | m: 42,08 ± 7,87<br>w: 40,8 ± 8,02 | m: 37,50 ± 17,68<br>w: 40,91 ± 9,69 | 12 Einheiten (4 Wochen)         | Prä-Post                                           | VAS              | Prä: 6,41 ± 1,21<br>Post: 0,70 ± 0,69       | Prä: 7,37 ± 0,71<br>Post: 4,41 ± 1,05      | Prä-Post IG: < 0,01<br>KG: < 0,01<br>Zwischen Gruppen Post: n.s.     |         |
| Atya et al. [8]                                                      | 2011                      | Life Science Journal                              | Nerven-Sehnen-gleitübungen               | Physikalische Therapie (Laser-therapie)        | Klinische & elektro-physiologische Untersuchung | 15 w               | 15 w               | 38,07 ± 2,25                      | 38,47 ± 2,29                        | 3x/Tag 10 x in 2 Monaten        | Prä-Post                                           | VAS              | Prä: 7,53 ± 1,5<br>Post: 5,2 ± 1,52         | Prä: 7,13 ± 1,3<br>Post: 2,86 ± 1,30       | Prä-Post IG: < 0,001<br>KG: < 0,001<br>Zwischen Gruppen Post: < 0,05 |         |
| Pratelli et al. [41]                                                 | 2015                      | Journal of bodywork and movement therapies        | Faszien-manipulation                     | Laser-therapie                                 | Klinische & elektro-physiologische Untersuchung | 35 sympt. Hände    | 35 sympt. Hände    | 54,2 (range 38-74)<br>29 w, 13 m  | 3 Wochen (IG)                       | 10 Tage nach letzter Behandlung | Prä-Post                                           | VAS              | Prä: 6,00 ± 2,6<br>Post 10 Tage: 0,8 ± 0,96 | Prä: 5,51 ± 2,24<br>Post 10 Tage: 5 ± 2,07 | <0,0001                                                              |         |
|                                                                      |                           |                                                   |                                          |                                                |                                                 |                    |                    |                                   | 5 Tage (KG)                         |                                 |                                                    |                  | 3 Monate                                    | 3 Monate 0,71 ± 0,93                       | 3 Monate 5,03 ± 2,02                                                 | <0,0001 |
|                                                                      |                           |                                                   |                                          |                                                |                                                 |                    |                    |                                   | BCTQ (SSS)                          |                                 |                                                    |                  | Prä: 3,03 ± 0,77                            | Prä: 3,05 ± 0,35                           |                                                                      |         |
|                                                                      |                           |                                                   |                                          |                                                |                                                 |                    |                    |                                   |                                     |                                 |                                                    |                  | Post 10 Tage: 1,36 ± 0,27                   | Post 10 Tage: 2,67 ± 0,47                  | <0,0001                                                              |         |
| BCTQ (FSS)                                                           | 3 Monate 1,28 ± 0,28      | 3 Monate 3,00 ± 0,31                              | <0,0001                                  |                                                |                                                 |                    |                    |                                   |                                     |                                 |                                                    |                  |                                             |                                            |                                                                      |         |
|                                                                      | Prä: 3,1 ± 0,98           | Prä: 2,9 ± 0,89                                   |                                          |                                                |                                                 |                    |                    |                                   |                                     |                                 |                                                    |                  |                                             |                                            |                                                                      |         |
| Post 10 Tage: 1,41 ± 0,3                                             | Post 10 Tage: 2,58 ± 0,79 | <0,0001                                           |                                          |                                                |                                                 |                    |                    |                                   |                                     |                                 |                                                    |                  |                                             |                                            |                                                                      |         |
| 3 Monate 1,32 ± 0,32                                                 | 3 Monate 2,63 ± 0,94      | <0,0001                                           |                                          |                                                |                                                 |                    |                    |                                   |                                     |                                 |                                                    |                  |                                             |                                            |                                                                      |         |
| Wolny et al. [55]                                                    | 2014                      | Physikalische Medizin                             | Neuro-mobilisation (manuelle Techniken & | Physikalische Therapie (Ultraschall-           | Klinische Untersuchung                          | 20 (1 m)           | 20 (3 m)           | 53,4 ± 10,73                      | 53,00 ± 9,41                        | 20 Einheiten/2x Woche 10 Wochen | Prä-Post                                           | NPRS             | Prä: 6,21 ± 1,83<br>Post: 1,5 ± 1,29        | Prä: 5,73 ± 1,56<br>Post: 4,5 ± 1,81       | Prä-Post IG: < 0,001<br>KG: < 0,001                                  |         |



| Autor                 | Jahr | Journal                                                | Intervention (IG)                                                                                     | Kontrolle (KG)                         | Diagnose                                        | Patient:innen (IG) | Patient:innen (KG) | Alter (IG) (MW ± SD) | Alter (KG) (MW ± SD) | Dauer (IG) | follow-up | Mess-instrumente           | Ergebnisse (IG) Score                 | Ergebnisse (KG) Score                 | P-Wert                                                                                              |
|-----------------------|------|--------------------------------------------------------|-------------------------------------------------------------------------------------------------------|----------------------------------------|-------------------------------------------------|--------------------|--------------------|----------------------|----------------------|------------|-----------|----------------------------|---------------------------------------|---------------------------------------|-----------------------------------------------------------------------------------------------------|
|                       |      |                                                        | Neuromobilisation)                                                                                    | & Lasertherapie)                       |                                                 |                    |                    |                      |                      |            |           | BCTQ (SSS)                 | Prä: 2,90 ± 0,75<br>Post: 1,64 ± 0,47 | Prä: 3,10 ± 0,65<br>Post: 2,79 ± 0,77 | Zwischen Gruppen Post: <0,001<br>Prä-Post IG: < 0,001<br>KG: n.s.<br>Zwischen Gruppen Post: < 0,001 |
|                       |      |                                                        |                                                                                                       |                                        |                                                 |                    |                    |                      |                      |            |           | BCTQ (FSS)                 | Prä: 2,79 ± 0,75<br>Post: 1,85 ± 0,49 | Prä: 3,17 ± 0,69<br>Post: 3,01 ± 0,68 | Prä-Post IG: < 0,001<br>KG: n.s.<br>Zwischen Gruppen Post: <0,001                                   |
| Wolny et al. [54]     | 2017 | Journal of Manipulative and Physiological Therapeutics | Manuelle Therapie (neurodynamische Technik, funktionelle Massage Trapezius & Handgelenkmobilisierung) | Physikalische Therapie (Lasertherapie) | Klinische & elektro-physiologische Untersuchung | 70                 | 70                 | 53,1 ± 8,7           | 51,5 ± 10,3          | 10 Wochen  | 1 Monat   | NPRS                       | Prä: 5,72 ± 1,49<br>Post: 1,47 ± 1,20 | Prä: 5,25 ± 1,75<br>Post: 3,58 ± 1,93 | <0,01                                                                                               |
|                       |      |                                                        |                                                                                                       |                                        |                                                 |                    |                    |                      |                      |            |           | BCTQ (SSS)                 | Prä: 2,97 ± 0,63<br>Post: 1,78 ± 0,47 | Prä: 2,94 ± 0,74<br>Post: 2,57 ± 0,77 | <0,01                                                                                               |
|                       |      |                                                        |                                                                                                       |                                        |                                                 |                    |                    |                      |                      |            |           | BCTQ (FSS)                 | Prä: 2,80 ± 0,94<br>Post: 1,90 ± 0,62 | Prä: 2,77 ± 0,94<br>Post: 2,55 ± 0,95 | <0,01                                                                                               |
| <b>Yoga</b>           |      |                                                        |                                                                                                       |                                        |                                                 |                    |                    |                      |                      |            |           |                            |                                       |                                       |                                                                                                     |
| Autor                 | Jahr | Journal                                                | Intervention (IG)                                                                                     | Kontrolle (KG)                         | Diagnose                                        | Patient:innen (IG) | Patient:innen (KG) | Alter (IG) (MW ± SD) | Alter (KG) (MW ± SD) | Dauer (IG) | follow-up | Mess-instrumente           | Ergebnisse (IG) Score                 | Ergebnisse (KG) Score                 | P-Wert                                                                                              |
| Garfinkel et al. [20] | 1998 | JAMA                                                   | Yoga                                                                                                  | Schiene                                | Klinische & elektro-physiologische Untersuchung | 22                 | 20                 | 48,9 (range 17-68)   | 48,7 (range 18-70)   | 8 Wochen   | 8 Wochen  | Schmerz letzte Woche (VAS) | Prä: 5,0 ± 2,8<br>Post: 2,9 ± 2,2     | Prä: 5,2 ± 2,1<br>Post: 4,3 ± 2,2     | IG: = 0,02<br>KG: n.s.                                                                              |
